# Supplementary material for: Generation of GLA-Knockout Human Embryonic Stem Cell Lines to Model Autophagic Dysfunction and Exosome Secretion in Fabry Disease-Associated Hypertrophic Cardiomyopathy
Source: PubMed Central journal article supplement (PMC6523555; doi:10.3390/cells8040327), 2019-04-08
Supplement: cells-08-00327-s001.pdf [file cells-08-00327-s001.pdf]

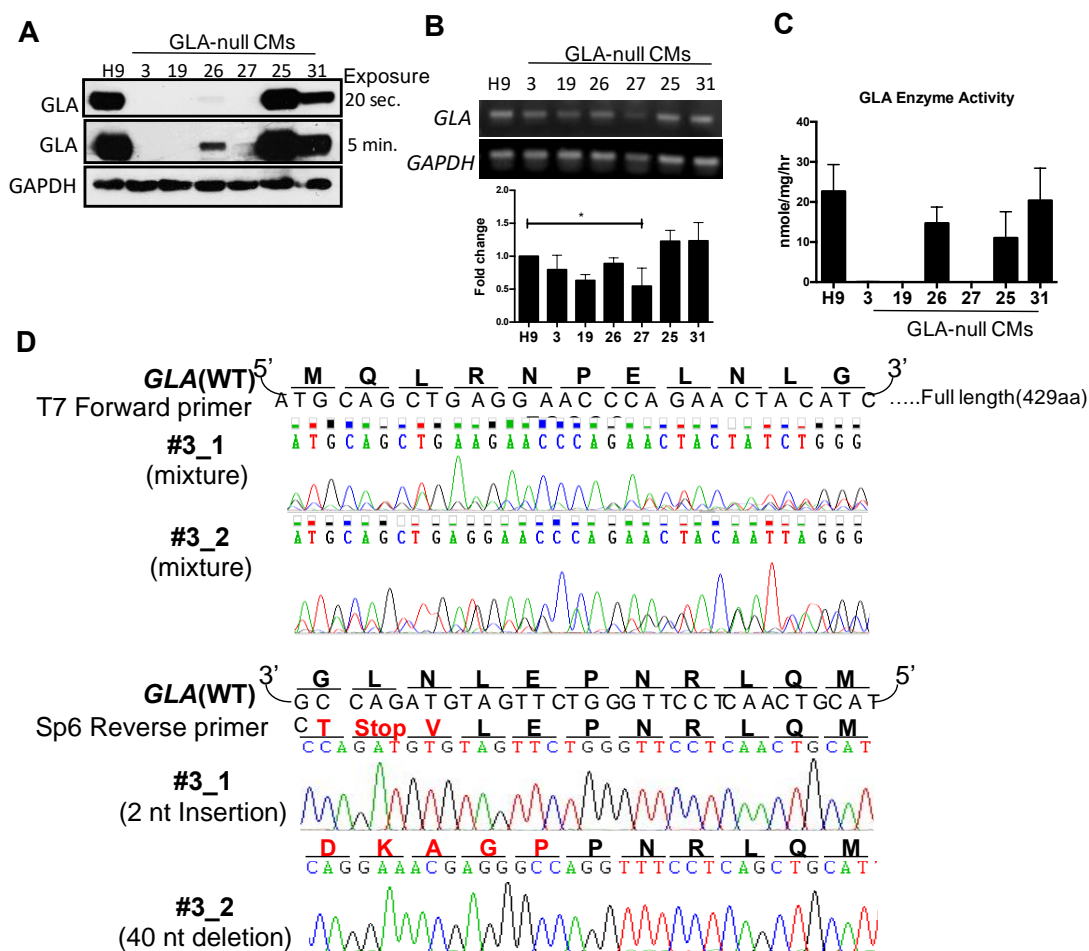

Supplementary Figure 1. (A) GLA protein expression level in GLA-null clones #3, 19, 26, 27, 25, and 31 derived CMs Exposure in short time:20 sec and longer time:5 mins. (B) mRNA level in GLA-null clones #3, 19, 26, 27, 25, and 31 derived CMs. (C) GLA enzyme activity in GLA-null clones #3, 19, 26, 27, 25, and 31 derived CMs. (D) Sanger sequencing analysis revealed heterogeneous population in clone #3.

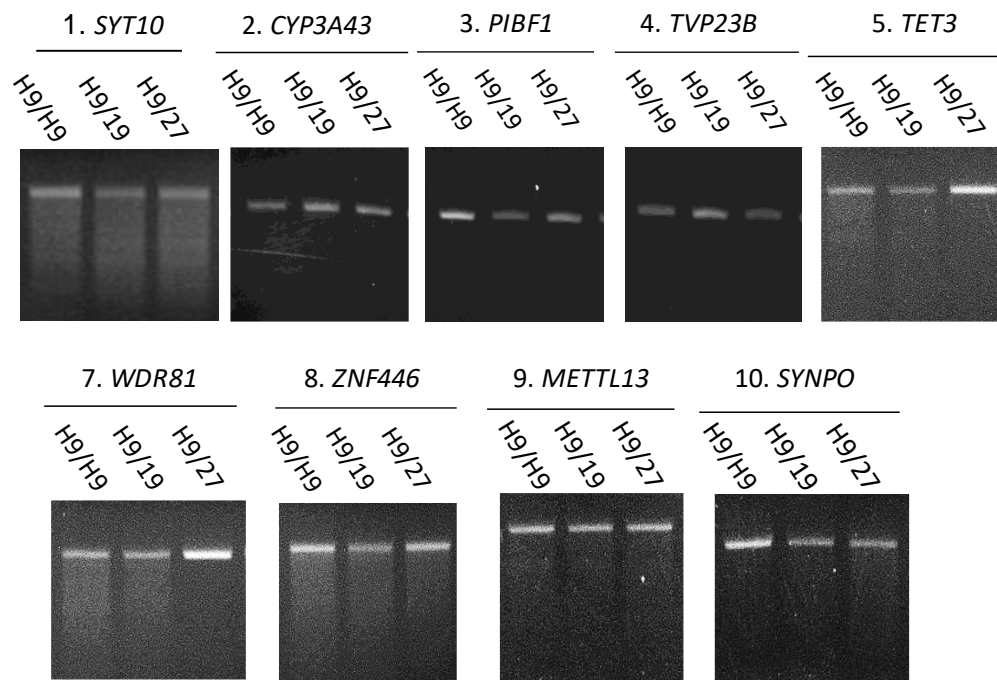

Supplementary Figure 2. T7E1 digestion assay validating the absence of CRSIPR/Cas9-induced mutations in the predicted off-target genes. T7E1 cleavage assay showing the absence of mismatch cleavage products.

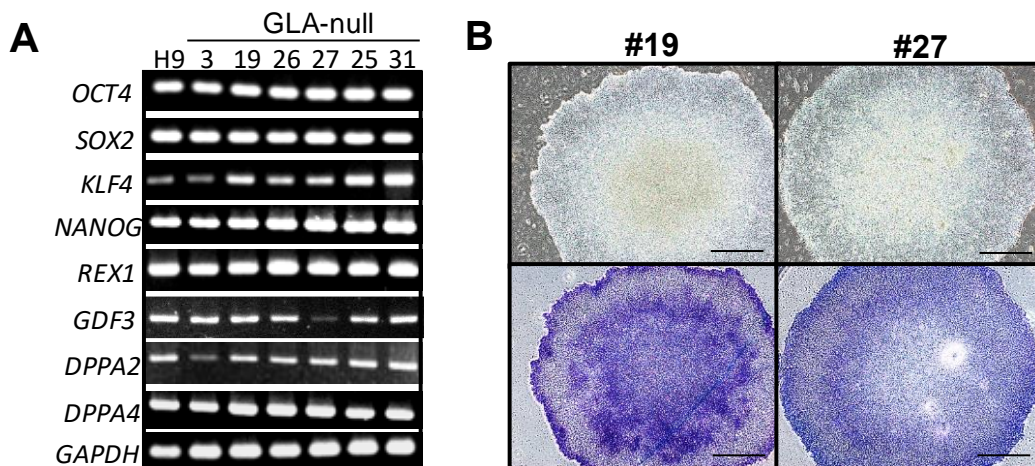

Supplementary Figure 3. Characterization of CRISPR/Cas9-edited GLA-null hESC clones. (A) RT-PCR analysis of expression of pluripotency-associated genes in CRISPR/Cas9-transfected hESC clones, including GLA-null clones #19 and #27. Untransfected parental hESCs (H9) served as a positive control. (B) Morphology and alkaline phosphatase activity of GLA-null hESC clones #19 and #27.

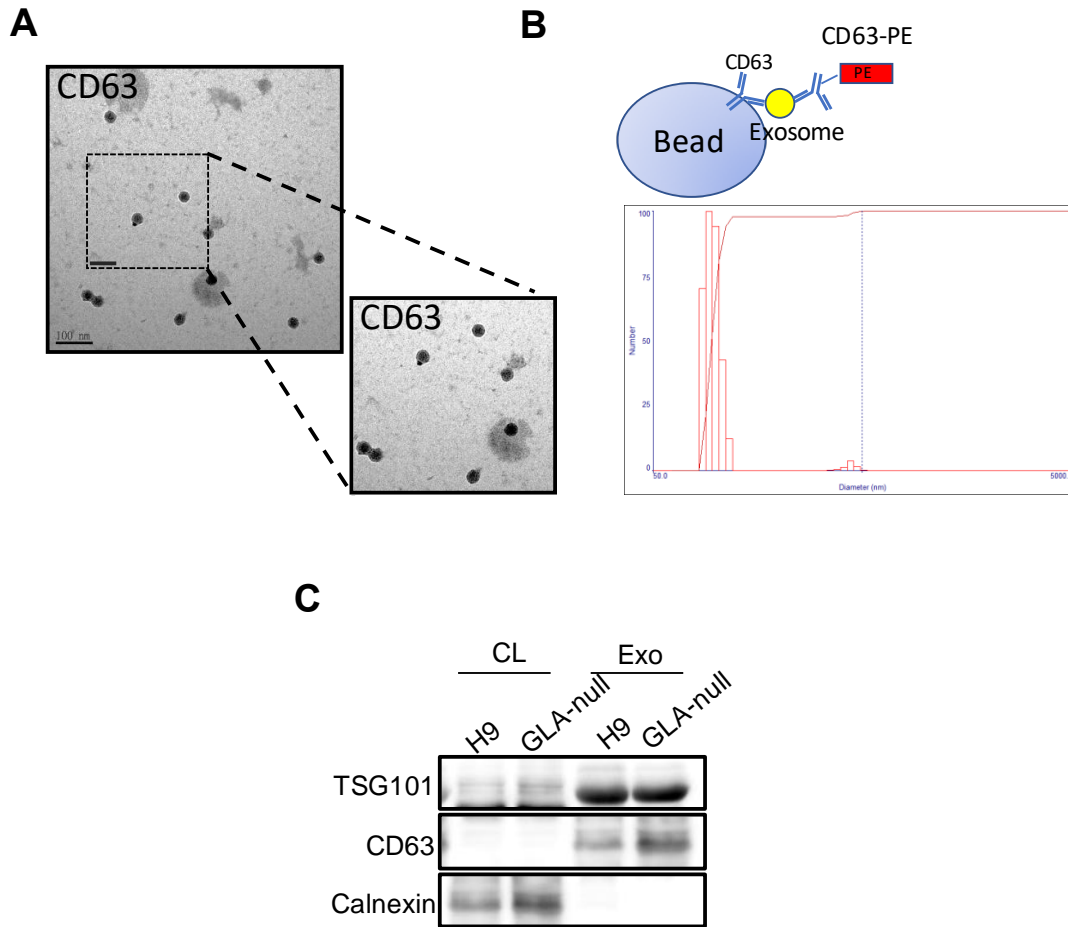

Supplementary Figure 4. Characterization of CM-derived exosomes. (A) Representative electron microscopy images of isolated exosomes. Scale bar: 100 uM. (B) CD63 PE-conjugated dynabeads isolated and identified distribution of CMs derived exosome sizes through Nanosight tracking system with a diameter range of 50–100 nm. (C) Western blot showing expression of exosomal markers TSG101 and CD63 in cell lysate (CL) and exosome-containing culture medium (Exo) of H9 and GLA-null CMs. Calnexin used as CL positive control.

Supplementary Table 1. List of primers used to amplify the predicted off-target gene loci.

|    | Gene No.     | Gene Name | Chromosome Site | Primer Sequence                                      | Product Size |
|----|--------------|-----------|-----------------|------------------------------------------------------|--------------|
| 1  | NM_198992    | SYT10     | chr12:-33559846 | TAGCATGGGCACAGAACCTG<br>TTCAGCATTAGGTGCCTGAATTA      | 684          |
| 2  | NR_103869    | CYP3A43   | chr7:+99454520  | CCAGGAAGTTGTGTCCAAAGG<br>CAGTGTGTCTCCTGATTGGATG      | 699          |
| 3  | NM_006346    | PIBF1     | chr13:+73467918 | AGCAAGCTGGGAAACAATGC<br>CCCTCCAGAAACATGGTGT          | 867          |
| 4  | NM_016078    | TVP23B    | chr17:+18702311 | TCCTTGATCATTGGTAGGAAAGGT<br>TTGTTAGGCAGCAATAGGTTACCA | 739          |
| 5  | NM_144993    | TET3      | chr2:-74328546  | GTCCCCAAGAGGACTAACG<br>GGGCACACTCGATGAGGAT           | 674          |
| 7  | NM_152348    | WDR81     | chr17:-1639089  | GCGGTGAGTTGGGGATTAG<br>AGCACCATGAAGCCTGAGGA          | 660          |
| 8  | NM_017908    | ZNF446    | chr19:-58992296 | ACCGCAAGAGCCACACAG<br>AACTGCCTATTCCCGACCA            | 679          |
| 9  | NM_014955    | METTL13   | chr1:+171759733 | GCACACTGCTGCCAGTAACC<br>CAGGGACTTCAGGTGAAAACG        | 736          |
| 10 | NM_001166208 | SYNPO     | chr5:-150031531 | CCTGGATTCTAACAGACCAACTGC<br>GAGCAGGCCACTCCACTT       | 699          |

Supplementary Table 2. Sequences of the primers used to analyze stemness markers by RT-PCR

| Name         | Sequence                                                 | Predicted size |
|--------------|----------------------------------------------------------|----------------|
| <i>OCT4</i>  | F_C TTCAGGCACTGTGTTTCATTG<br>R_TTTGGCTGAACACCTTCCCA      | 672 bp         |
| <i>SOX2</i>  | F_GCCCTGCAGTACAACCTCCAT<br>R_TTCCTGCAAAGCTCCTACCG        | 735 bp         |
| <i>KLF4</i>  | F_AGTTTCCCGACCAGAGAGA<br>R_ACGCGAACGTGGAGAAAGAT          | 667 bp         |
| <i>NANOG</i> | F_GAAGACAAGGTCCCGGTCAA<br>R_GGATTCAGCCAGTGTCCAGA         | 709 bp         |
| <i>REX1</i>  | F_GTGGGCCTTATGTGATGGCT<br>R_TGCGTTAGGATGTGGGCTTT         | 759 bp         |
| <i>GDF3</i>  | F_GTTTGTGTTGCGGTCAGTCC<br>R_CTTGGGGGCAATGATCCACT         | 361 bp         |
| <i>DPPA2</i> | F_CCGTCCCCGCAATCTCCTTCCATC<br>R_ATGATGCCAACATGGCTCCCGGTG | 606 bp         |
| <i>DPPA4</i> | F_TAGCACAGCAAAGAGGCCA<br>R_TGCATGGCCATAAACAGGT           | 635 bp         |
| <i>GAPDH</i> | F_AGAAGGCTGGGGCTCATTG<br>R_AGGGGCCATCCACAGTCTTC          | 258 bp         |

Supplementary Table 3. Antibodies used in this study

| Target | Source                    | Catalog number |
|--------|---------------------------|----------------|
| GLA    | GeneTex                   | GTX101178      |
| NANOG  | Cell Signaling Technology | #4903          |

|           |                           |         |
|-----------|---------------------------|---------|
| OCT4      | Cell Signaling Technology | #2750   |
| TRA-1-81  | Abcam                     | Ab16289 |
| TRA-1-60  | Abcam                     | Ab16288 |
| Nestin    | Cell Signaling Technology | #4760   |
| alpha-SMA | Cell Signaling Technology | #19245  |
| AFP       | Cell Signaling Technology | #4448   |

*Supplementary Table 4.* List of the differentially downregulated proteins involved in regulated exosome release.

| Uniprot                | Protein Name                                                   | Gene Name |
|------------------------|----------------------------------------------------------------|-----------|
| <a href="#">Q13636</a> | Ras-related protein Rab-11                                     | RAB11     |
| <a href="#">Q86VN1</a> | Vacuolar protein-sorting-associated protein 36                 | VPS36     |
| <a href="#">Q13017</a> | Rho GTPase-activating protein 5                                | ARHGAP5   |
| <a href="#">P52566</a> | Rho GDP-dissociation inhibitor 2                               | ARHGDI2   |
| <a href="#">Q9NP61</a> | ADP-ribosylation factor GTPase-activating protein 3            | ARFGAP3   |
| <a href="#">P35475</a> | Alpha-L-iduronidase                                            | IDUA      |
| <a href="#">Q96AJ9</a> | Vesicle transport through interaction with t-SNAREs homolog 1A | VTI1A     |
| <a href="#">Q14894</a> | Ketimine reductase mu-crystallin                               | CRYM      |
| <a href="#">P07996</a> | Thrombospondin-1                                               | THBS1     |
| <a href="#">Q02952</a> | A-kinase anchor protein 12                                     | AKAP12    |
| <a href="#">Q9UJA5</a> | tRNA-methyltransferase non-catalytic subunit TRM6              | TRMT6     |
| <a href="#">Q96EY4</a> | Translation machinery-associated protein 16                    | TMA16     |
| <a href="#">Q86S22</a> | Trafficking protein particle complex subunit 6B                | TRAPPC6B  |

#### *Supplemental Reference*

1. Labuhn, M., et al., Refined sgRNA efficacy prediction improves large- and small-scale CRISPR-Cas9 applications. *Nucleic Acids Res*, 2018. 46(3): p. 1375-1385.
